# Supplementary material for: From Resistance to Engagement: Factors That Influence Student Outcomes in Team-Based Learning
Source: Research Square preprint supplement (doi:10.21203/rs.3.rs-6658854/v1), 2025-07-10
Supplement: Supplementary file 1 [file 21d7f7dceeeba1866ceaa10b.docx]

**Questionnaire**

1. What do you (personally) like best about the TBL format?
2. What do you (personally) not like about the TBL format?
3. What are the pros and cons of using TBL in a biomedical graduate course?
4. What are some common problems you have faced while adjusting to the TBL format?
5. What do you think is the logic behind adopting the TBL format in a biomedical graduate course?
6. What are your suggestions for other students who are thinking about taking a TBL-based course?
7. What are your suggestions for the instructors who implement the TBL format in their courses?
