# Supplementary material for: From Resistance to Engagement: Factors That Influence Student Outcomes in Team-Based Learning
Source: Research Square preprint supplement (doi:10.21203/rs.3.rs-6658854/v1), 2025-07-10
Supplement: Supplementary file 2 [file 766e9ea5e48d696ac866ee59.docx]

**Focus group protocol**

1. How would you describe your experience with TBL?
2. What is your definition of "learning"? What happens when you know you’ve learned? What helps you best in the process? Why? How?
3. Do you learn science subjects any differently than other subjects (e.g., humanities)?
4. What should a "good science teacher" look like? What role should they play in the students’ learning process?
5. What should a "good science student" look like? What role should they play in their own learning process?
6. How do you observe the power dynamics playing a hand in the process of your education?

Additional questions (if time permits):

- Questions emerged from the direct observation data: ask students to explain certain behaviors shown during class discussion sessions (e.g. confusion, aggression, frustration, resistance, fun, teamwork)
- Questions emerged from the questionnaire data: ask students to explain certain points raised in the questionnaires.
